# Supplementary material
Source: Copernicus journal article supplement (doi:10.5194/egusphere-2026-874)
Supplement: Supplementary file 1 [file egusphere-2026-874-supplement.pdf]

## Supporting Information

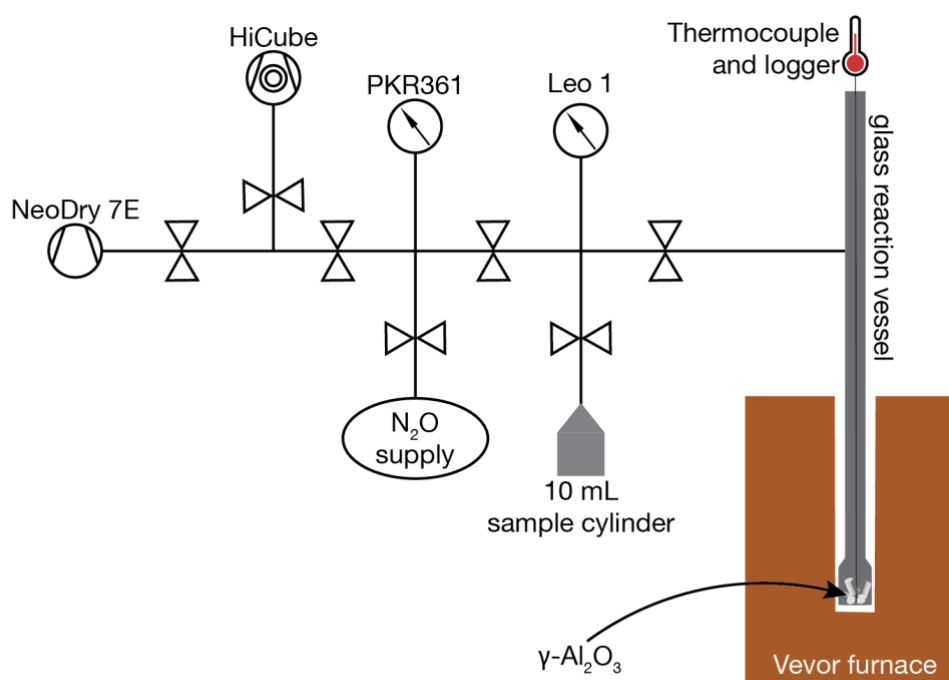

 : Swagelok diaphragm-sealed valves

**Figure S1.** Vevor furnace and vacuum line used for equilibration of  $N_2O$  over  $\gamma-Al_2O_3$  and sample loading and recovery. The glass reaction vessel is a 12 mm quartz glass tube, widening at the base to 22 mm. Within the furnace it is packed in sand and then placed within a stainless-steel thermal mass to maximize the uniformity of temperature. The thermocouple is placed in a 3 mm glass tube passing through an UltraTorr connection (Swagelok, USA) at the top of the glass reaction vessel.

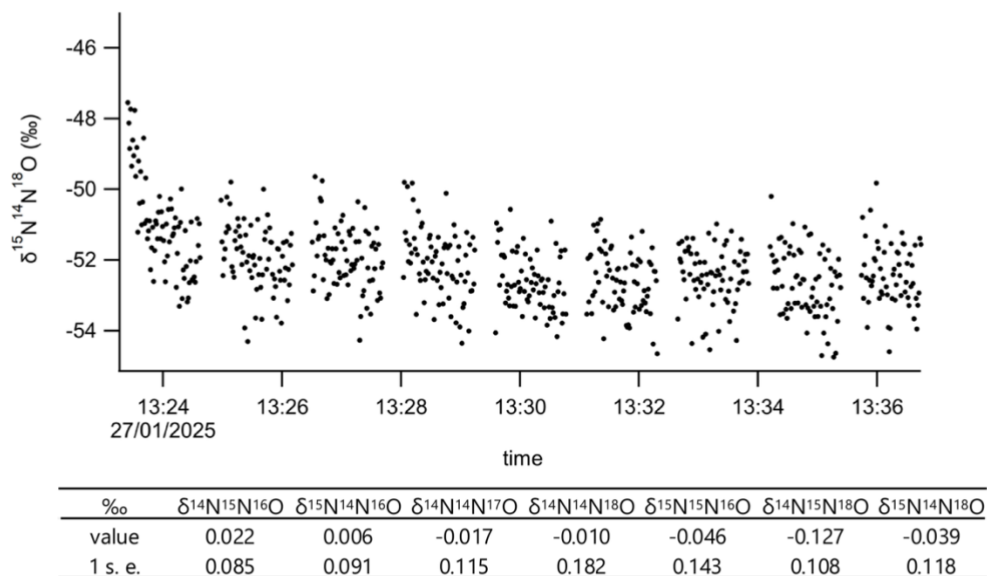

**Supplementary Figure 2. Representative repeatability of working gas measurements, shown for  $\delta^{15}\text{N}^{14}\text{N}^{18}\text{O}$  and summarized for all isotopologues. The values here are reported directly as calculated from isotopologue concentrations reported by TDLWintel, before any corrections are applied.**

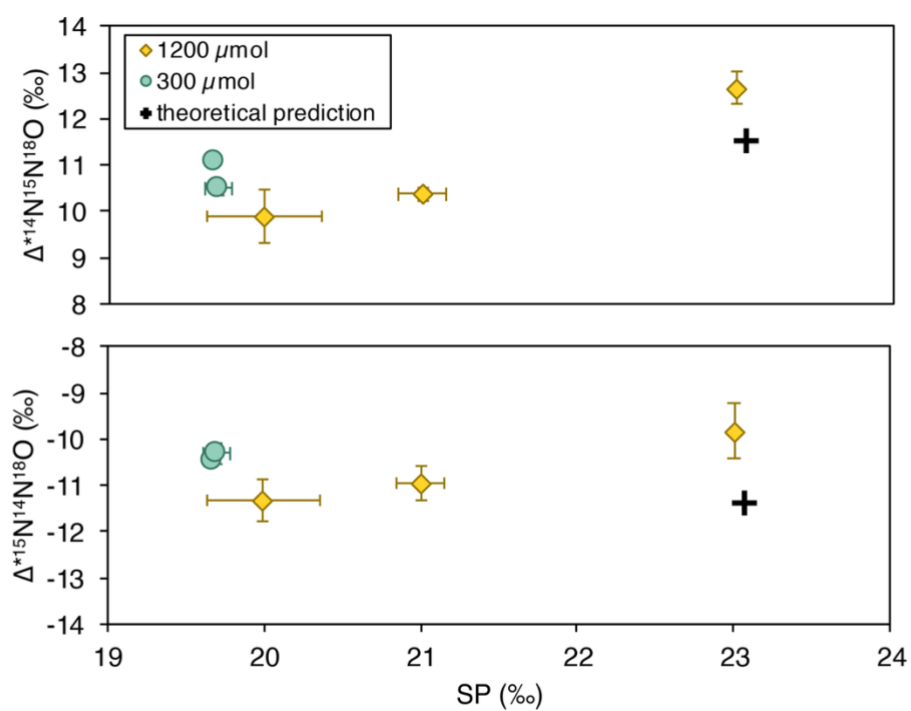

**Supplementary Figure 3. Clumped isotopic composition of N<sub>2</sub>O heated over  $\gamma$ -Al<sub>2</sub>O<sub>3</sub> at 218 °C. Variable outcomes for 1200  $\mu$ mol N<sub>2</sub>O and convergence on a single composition for 300  $\mu$ mol samples are observed, as discussed in Sect. 3.4. The offset between this converged-upon value and the theoretical prediction matches those seen at other temperatures, as discussed in the main text.**

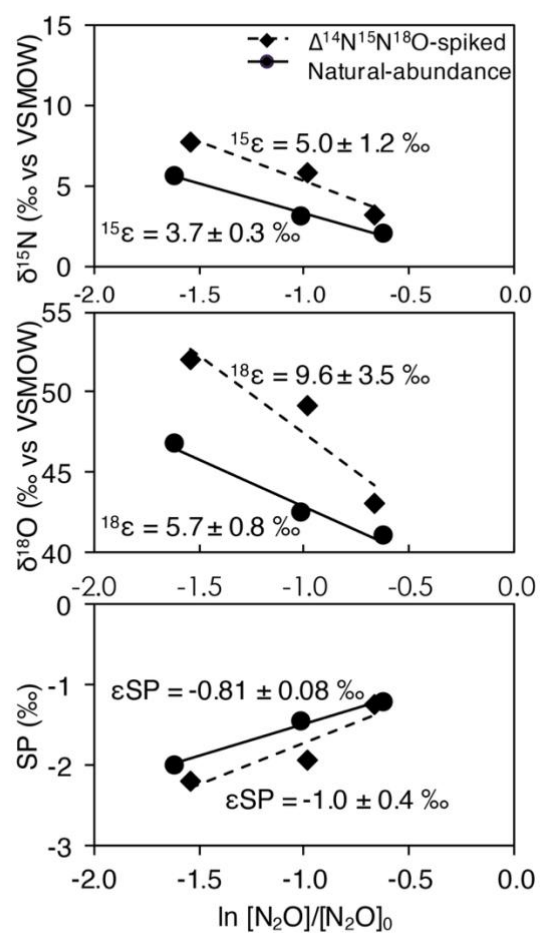

Supplementary Figure 4. Rayleigh fractionation plots used to determine the isotope effects  $\epsilon$  associated with the thermal decomposition of  $\text{N}_2\text{O}$ . The reaction progress is from right to left.
